# Supplementary material for: Production of Biogenic Nanoparticles for the Reduction of 4-Nitrophenol and Oxidative Laccase-Like Reactions
Source: Front Microbiol. 2019 May 7;10:997. doi: 10.3389/fmicb.2019.00997 (PMC6520526; doi:10.3389/fmicb.2019.00997)
Supplement: TABLE S1 — Statistical analyses of oxidase experiments. [file Table_1.XLSX]

## Sheet: Sheet1
Substrate	Catalyst	Concentration catalyst	Statistical analysis	Factor	Factor	Factor	Pairwise Multiple Comparison Procedures (Bonferroni t-test):	Factor	Factor
TMB	PtNPs		Two Way ANOVA	pH	concentration of metal	pH x concentration of metal		pH	concentration of metal
TMB	PtNPs			<0.001	<0.001	<0.001		<0.001	<0.001
TMB	PtNPs						Comparisons for factor: pH
TMB	PtNPs						Comparison	P	P<0.050
TMB	PtNPs						pH 3.000 vs. pH 7.000	<0.001	Yes
TMB	PtNPs						pH 3.000 vs. pH 5.000	0.003	Yes
TMB	PtNPs						pH 5.000 vs. pH 7.000	<0.001	Yes
TMB	PtNPs						Comparisons for factor: concentration_PtNPs (µM)
TMB	PtNPs						Comparison	P	P<0.050
TMB	PtNPs						500 µM vs. 100 µM	<0.001	Yes
TMB	PtNPs						500 µM vs. 250 µM	<0.001	Yes
TMB	PtNPs						250 µM vs. 100 µM	<0.001	Yes
TMB	PtNPs						Comparisons for factor: concentration_PtNPs (µM) pH3
TMB	PtNPs						Comparison	P	P<0.050
TMB	PtNPs						500 µM vs. 100 µM	<0.001	Yes
TMB	PtNPs						500 µM vs. 250 µM	<0.001	Yes
TMB	PtNPs						250 µM vs. 100 µM	<0.001	Yes
TMB	PtNPs						Comparisons for factor: concentration_PtNPs (µM) pH5
TMB	PtNPs						Comparison	P	P<0.050
TMB	PtNPs						500 µM vs. 100 µM	<0.001	Yes
TMB	PtNPs						500 µM vs. 250 µM	0.056	No
TMB	PtNPs						250 µM vs. 100 µM	<0.001	Yes
TMB	PtNPs						Comparisons for factor: concentration_PtNPs (µM) pH7
TMB	PtNPs						Comparison	P	P<0.050
TMB	PtNPs						500 µM vs. 250 µM	0.462	No
TMB	PtNPs						500 µM vs. 100 µM	1	Do Not Test
TMB	PtNPs						100 µM vs. 250 µM	1	Do Not Test
TMB	PtNPs						Comparisons for factor: pH within PtNPs 100 µM
TMB	PtNPs						Comparison	P	P<0.050
TMB	PtNPs						pH 3 vs. pH 7	<0.001	Yes
TMB	PtNPs						pH 3 vs. pH 5	0.122	No
TMB	PtNPs						pH 5 vs. pH 7	<0.001	Yes
TMB	PtNPs						Comparisons for factor: pH within PtNPs 250 µM
TMB	PtNPs						Comparison	P	P<0.050
TMB	PtNPs						pH 3 vs. pH 7	<0.001	Yes
TMB	PtNPs						pH 3 vs. pH 5	0.984	No
TMB	PtNPs						pH 5 vs. pH 7	<0.001	Yes
TMB	PtNPs						Comparisons for factor: pH within PtNPs 500 µM
TMB	PtNPs						Comparison	P	P<0.050
TMB	PtNPs						pH 3 vs. pH 7	<0.001	Yes
TMB	PtNPs						pH 3 vs. pH 5	0.006	Yes
TMB	PtNPs						pH 5 vs. pH 7	<0.001	Yes
TMB	Pt ionic vs PtNPs	100 µM	Two Way ANOVA	ionic/NPs 100 µM	pH	ionic/NPs x pH
TMB	Pt ionic vs PtNPs	100 µM		<0.001	<0.001	<0.001
TMB	Pt ionic vs PtNPs	100 µM					Comparisons for factor ions vs PtNPs
TMB	Pt ionic vs PtNPs	100 µM					Comparison	P	P<0.050
TMB	Pt ionic vs PtNPs	100 µM					ionic Pt versus PtNPs	<0.001	Yes
TMB	Pt ionic vs PtNPs	100 µM					Comparisons for factor: pH
TMB	Pt ionic vs PtNPs	100 µM					Comparison	P	P<0.050
TMB	Pt ionic vs PtNPs	100 µM					pH5 vs pH7	<0.001	Yes
TMB	Pt ionic vs PtNPs	100 µM					pH5 vs pH3	0.66	No
TMB	Pt ionic vs PtNPs	100 µM					pH3 vs pH7	<0.001	Yes
TMB	Pt ionic vs PtNPs	100 µM					Comparisons for factor: pH within ionic Pt
TMB	Pt ionic vs PtNPs	100 µM					Comparison	P	P<0.050
TMB	Pt ionic vs PtNPs	100 µM					pH5 vs pH7	<0.001	Yes
TMB	Pt ionic vs PtNPs	100 µM					pH5 vs pH3	0.01	Yes
TMB	Pt ionic vs PtNPs	100 µM					pH3 vs pH7	<0.001	Yes
TMB	Pt ionic vs PtNPs	100 µM					Comparisons for factor: pH within PtNPs
TMB	Pt ionic vs PtNPs	100 µM					Comparison	P	P<0.050
TMB	Pt ionic vs PtNPs	100 µM					pH5 vs pH7	<0.001	Yes
TMB	Pt ionic vs PtNPs	100 µM					pH5 vs pH3	0.287	No
TMB	Pt ionic vs PtNPs	100 µM					pH3 vs pH7	<0.001	Yes
TMB	Pt ionic vs PtNPs	100 µM					Comparisons for factor pH3
TMB	Pt ionic vs PtNPs	100 µM					Comparison	P	P<0.050
TMB	Pt ionic vs PtNPs	100 µM					ionic Pt versus PtNPs	<0.001	Yes
TMB	Pt ionic vs PtNPs	100 µM					Comparisons for factor pH5
TMB	Pt ionic vs PtNPs	100 µM					Comparison	P	P<0.050
TMB	Pt ionic vs PtNPs	100 µM					ionic Pt versus PtNPs	<0.001	Yes
TMB	Pt ionic vs PtNPs	100 µM					Comparisons for factor pH7
TMB	Pt ionic vs PtNPs	100 µM					Comparison	P	P<0.050
TMB	Pt ionic vs PtNPs	100 µM					ionic Pt versus PtNPs	0.005	Yes
TMB	PdNPs		Two Way ANOVA	pH	concentration of metal	pH x concentration of metal
TMB	PdNPs			<0.001	<0.001	<0.001
TMB	PdNPs						All Pairwise Multiple Comparison Procedures (Bonferroni t-test):
TMB	PdNPs						Comparisons for factor: pH
TMB	PdNPs						pH 3 vs. pH 5	<0.001	Yes
TMB	PdNPs						pH 3 vs. pH 7	<0.001	Yes
TMB	PdNPs						pH 5 vs. pH 7	<0.001	Yes
TMB	PdNPs						Comparisons for factor: concentration_PdNPs (µM)
TMB	PdNPs						Comparison	P	P<0.050
TMB	PdNPs						500 µM vs. 100 µM	<0.001	Yes
TMB	PdNPs						500 µM vs. 250 µM	<0.001	Yes
TMB	PdNPs						250 µM vs. 100 µM	<0.001	Yes
TMB	PdNPs						Comparisons for factor: concentration_PdNPs (µM) pH3
TMB	PdNPs						Comparison	P	P<0.050
TMB	PdNPs						500 µM vs. 100 µM	<0.001	Yes
TMB	PdNPs						500 µM vs. 250 µM	1	No
TMB	PdNPs						250 µM vs. 100 µM	<0.001	Yes
TMB	PdNPs						Comparisons for factor: concentration_PdNPs (µM) pH5
TMB	PdNPs						Comparison	P	P<0.050
TMB	PdNPs						500 µM vs. 100 µM	<0.001	Yes
TMB	PdNPs						500 µM vs. 250 µM	<0.001	Yes
TMB	PdNPs						250 µM vs. 100 µM	<0.001	Yes
TMB	PdNPs						Comparisons for factor: concentration_PdNPs (µM) pH7
TMB	PdNPs						Comparison	P	P<0.050
TMB	PdNPs						500 µM vs. 100 µM	<0.001	Yes
TMB	PdNPs						500 µM vs. 250 µM	<0.001	Yes
TMB	PdNPs						250 µM vs. 100 µM	<0.001	Yes
TMB	PdNPs						Comparisons for factor: pH within PdNPs 100 µM
TMB	PdNPs						Comparison	P	P<0.050
TMB	PdNPs						pH 3 vs. pH 5	0.001	Yes
TMB	PdNPs						pH 3 vs. pH 7	0.004	Yes
TMB	PdNPs						pH 5 vs. pH 7	1	No
TMB	PdNPs						Comparisons for factor: pH within PdNPs 250 µM
TMB	PdNPs						Comparison	P	P<0.050
TMB	PdNPs						pH 3 vs. pH 5	<0.001	Yes
TMB	PdNPs						pH 3 vs. pH 7	<0.001	Yes
TMB	PdNPs						pH 5 vs. pH 7	<0.001	Yes
TMB	PdNPs						Comparisons for factor: pH within PdNPs 500 µM
TMB	PdNPs						Comparison	P	P<0.050
TMB	PdNPs						pH 3 vs. pH 5	<0.001	Yes
TMB	PdNPs						pH 3 vs. pH 7	1	No
TMB	PdNPs						pH 5 vs. pH 7	<0.001	Yes
TMB	Pd ionic		Two Way ANOVA	pH	concentration of metal	pH x concentration of metal
TMB	Pd ionic			<0.001	<0.001	<0.001
TMB	Pd ionic						Comparisons for factor: pH
TMB	Pd ionic						Comparison	P	P<0.050
TMB	Pd ionic						pH 3 vs. pH 7	<0.001	Yes
TMB	Pd ionic						pH 3 vs. pH 5	<0.001	Yes
TMB	Pd ionic						pH 5 vs. pH 7	0.002	Yes
TMB	Pd ionic						Comparisons for factor: concentration ionic Pd (µM)
TMB	Pd ionic						Comparison	P	P<0.050
TMB	Pd ionic						500 µM vs. 100 µM	<0.001	Yes
TMB	Pd ionic						500 µM vs. 250 µM	<0.001	Yes
TMB	Pd ionic						250 µM vs. 100 µM	1	No
TMB	Pd ionic						Comparisons for factor: concentration_Pd ionic (µM) pH3
TMB	Pd ionic						Comparison	P	P<0.050
TMB	Pd ionic						500 µM vs. 100 µM	<0.001	Yes
TMB	Pd ionic						500 µM vs. 250 µM	<0.001	Yes
TMB	Pd ionic						250 µM vs. 100 µM	0.452	No
TMB	Pd ionic						Comparisons for factor: concentration_Pd ionic (µM) pH5
TMB	Pd ionic						Comparison	P	P<0.050
TMB	Pd ionic						100 µM vs. 250 µM	0.923	No
TMB	Pd ionic						100 µM vs. 500 µM	1	Do Not Test
TMB	Pd ionic						500 µM vs. 250 µM	1	Do Not Test
TMB	Pd ionic						Comparisons for factor: concentration_Pd ionic (µM) pH7
TMB	Pd ionic						Comparison	P	P<0.050
TMB	Pd ionic						500 µM vs. 100 µM	0.003	Yes
TMB	Pd ionic						500 µM vs. 250 µM	0.013	Yes
TMB	Pd ionic						250 µM vs. 100 µM	1	No
TMB	Pd ionic						Comparisons for factor: pH within Pd ionic 100 µM
TMB	Pd ionic						Comparison	P	P<0.050
TMB	Pd ionic						pH 5 vs. pH 7	<0.001	Yes
TMB	Pd ionic						pH 5 vs. pH 3	1	No
TMB	Pd ionic						pH 3 vs. pH 7	0.001	Yes
TMB	Pd ionic						Comparisons for factor: pH within Pd ionic 250 µM
TMB	Pd ionic						Comparison	P	P<0.050
TMB	Pd ionic						pH 3 vs. pH 7	<0.001	Yes
TMB	Pd ionic						pH 3 vs. pH 5	0.111	No
TMB	Pd ionic						pH 5 vs. pH 7	0.032	Yes
TMB	Pd ionic						Comparisons for factor: pH within Pd ionic 500 µM
TMB	Pd ionic						Comparison	P	P<0.050
TMB	Pd ionic						pH 3 vs. pH 7	<0.001	Yes
TMB	Pd ionic						pH 3 vs. pH 5	<0.001	Yes
TMB	Pd ionic						pH 5 vs. pH 7	1	No
TMB	Pd ionic vs PdNPs	100uM	Two Way ANOVA	ionic/NPs 100 µM	pH	ionic/NPs x pH
TMB	Pd ionic vs PdNPs	100uM		<0.001	<0.001	0.003
TMB	Pd ionic vs PdNPs	100uM					All Pairwise Multiple Comparison Procedures (Bonferroni t-test):
TMB	Pd ionic vs PdNPs	100uM					Comparisons for factor Pd ions vs PdNPs at concentration 100 µM
TMB	Pd ionic vs PdNPs	100uM					Comparison	P	P<0.050
TMB	Pd ionic vs PdNPs	100uM					ionic Pt versus PtNPs	<0.001	Yes
TMB	Pd ionic vs PdNPs	100uM					Comparisons for factor: pH
TMB	Pd ionic vs PdNPs	100uM					Comparison	P	P<0.050
TMB	Pd ionic vs PdNPs	100uM					pH3 vs pH7	<0.001	Yes
TMB	Pd ionic vs PdNPs	100uM					pH3 vs pH5	0.005	Yes
TMB	Pd ionic vs PdNPs	100uM					pH5 vs pH7	0.026	Yes
TMB	Pd ionic vs PdNPs	100uM					Comparisons for factor: pH within ioni Pd ( 100 µM)
TMB	Pd ionic vs PdNPs	100uM					Comparison	P	P<0.050
TMB	Pd ionic vs PdNPs	100uM					pH5 vs pH7	0.009	Yes
TMB	Pd ionic vs PdNPs	100uM					pH5 vs pH3	1	No
TMB	Pd ionic vs PdNPs	100uM					pH3 vs pH7	0.016	Yes
TMB	Pd ionic vs PdNPs	100uM					Comparisons for factor: pH within PdNPs ( 100 µM)
TMB	Pd ionic vs PdNPs	100uM					Comparison	P	P<0.050
TMB	Pd ionic vs PdNPs	100uM					pH3 vs pH7	<0.001	Yes
TMB	Pd ionic vs PdNPs	100uM					pH3 vs pH5	<0.001	Yes
TMB	Pd ionic vs PdNPs	100uM					pH5 vs pH7	1	No
TMB	Pd ionic vs PdNPs	100uM					Comparisons for factor pH3
TMB	Pd ionic vs PdNPs	100uM					Comparison	P	P<0.050
TMB	Pd ionic vs PdNPs	100uM					PdNPs vs ionic Pd ( 100 µM)	<0.001	Yes
TMB	Pd ionic vs PdNPs	100uM					Comparisons for factor pH5
TMB	Pd ionic vs PdNPs	100uM					Comparison	P	P<0.050
TMB	Pd ionic vs PdNPs	100uM					PdNPs vs ionic Pd ( 100 µM)	0.014	Yes
TMB	Pd ionic vs PdNPs	100uM					Comparisons for factor pH7
TMB	Pd ionic vs PdNPs	100uM					Comparison	P	P<0.050
TMB	Pd ionic vs PdNPs	100uM					PdNPs vs ionic Pd ( 100 µM)	<0.001	Yes
TMB	Pd ionic vs PdNPs	250uM					Comparisons for factor Pd ions vs PdNPs at concentration 250 µM
TMB	Pd ionic vs PdNPs	250uM					Comparison	P	P<0.050
TMB	Pd ionic vs PdNPs	250uM					ionic Pt versus PtNPs	<0.001	Yes
TMB	Pd ionic vs PdNPs	250uM					Comparisons for factor: pH
TMB	Pd ionic vs PdNPs	250uM					Comparison	P	P<0.050
TMB	Pd ionic vs PdNPs	250uM					3.000 vs. 5.000	<0.001	Yes
TMB	Pd ionic vs PdNPs	250uM					3.000 vs. 7.000	<0.001	Yes
TMB	Pd ionic vs PdNPs	250uM					7.000 vs. 5.000	<0.001	Yes
TMB	Pd ionic vs PdNPs	250uM					Comparisons for factor: pH within Pd ions
TMB	Pd ionic vs PdNPs	250uM					Comparison	P	P<0.050
TMB	Pd ionic vs PdNPs	250uM					pH3 vs pH7	0.046	Yes
TMB	Pd ionic vs PdNPs	250uM					pH3 vs pH5	0.448	No
TMB	Pd ionic vs PdNPs	250uM					pH5 vs pH7	0.666	No
TMB	Pd ionic vs PdNPs	250uM					Comparisons for factor: pH within PdNPs
TMB	Pd ionic vs PdNPs	250uM					Comparison	P	P<0.050
TMB	Pd ionic vs PdNPs	250uM					pH3 vs pH5	<0.001	Yes
TMB	Pd ionic vs PdNPs	250uM					pH3 vs pH7	<0.001	Yes
TMB	Pd ionic vs PdNPs	250uM					pH5 vs pH7	<0.001	Yes
TMB	Pd ionic vs PdNPs	250uM					Comparisons for factor pH3
TMB	Pd ionic vs PdNPs	250uM					Comparison	P	P<0.050
TMB	Pd ionic vs PdNPs	250uM					PdNPs vs ionic Pd ( 250 µM)	<0.001	Yes
TMB	Pd ionic vs PdNPs	250uM					Comparisons for factor pH5
TMB	Pd ionic vs PdNPs	250uM					Comparison	P	P<0.050
TMB	Pd ionic vs PdNPs	250uM					PdNPs vs ionic Pd ( 250 µM)	<0.001	Yes
TMB	Pd ionic vs PdNPs	250uM					Comparisons for factor pH7
TMB	Pd ionic vs PdNPs	250uM					Comparison	P	P<0.050
TMB	Pd ionic vs PdNPs	250uM					PdNPs vs ionic Pd ( 250 µM)	<0.001	Yes
TMB	Pd ionic vs PdNPs	500uM	Two Way ANOVA	ionic/NPs 500 µM	pH	ionic/NPs x pH
TMB	Pd ionic vs PdNPs	500uM		<0.001	<0.001	<0.001	Comparisons for factor Pd ions vs PdNPs at concentration 500 µM
TMB	Pd ionic vs PdNPs	500uM					Comparison	P	P<0.050
TMB	Pd ionic vs PdNPs	500uM					PdNPs vs ionic Pd ( 500 µM)	<0.001	Yes
TMB	Pd ionic vs PdNPs	500uM					Comparisons for factor: pH
TMB	Pd ionic vs PdNPs	500uM					Comparison	P	P<0.050
TMB	Pd ionic vs PdNPs	500uM					pH3 vs pH5	<0.001	Yes
TMB	Pd ionic vs PdNPs	500uM					pH3 vs pH7	<0.001	Yes
TMB	Pd ionic vs PdNPs	500uM					pH7 vs pH5	<0.001	Yes
TMB	Pd ionic vs PdNPs	500uM					Comparisons for factor: pH within 1
TMB	Pd ionic vs PdNPs	500uM					Comparison	P	P<0.050
TMB	Pd ionic vs PdNPs	500uM					pH3 vs pH7	0.046	Yes
TMB	Pd ionic vs PdNPs	500uM					pH3 vs pH5	0.448	No
TMB	Pd ionic vs PdNPs	500uM					pH7 vs pH5	0.666	No
TMB	Pd ionic vs PdNPs	500uM					Comparisons for factor: pH within 2
TMB	Pd ionic vs PdNPs	500uM					Comparison	P	P<0.050
TMB	Pd ionic vs PdNPs	500uM					pH3 vs pH5	<0.001	Yes
TMB	Pd ionic vs PdNPs	500uM					pH3 vs pH7	<0.001	Yes
TMB	Pd ionic vs PdNPs	500uM					pH7 vs pH5	<0.001	Yes
TMB	Pd ionic vs PdNPs	500uM					Comparisons for factor pH3
TMB	Pd ionic vs PdNPs	500uM					Comparison	P	P<0.050
TMB	Pd ionic vs PdNPs	500uM					PdNPs vs ionic Pd ( 500 µM)	<0.001	Yes
TMB	Pd ionic vs PdNPs	500uM					Comparisons for factor pH5
TMB	Pd ionic vs PdNPs	500uM					Comparison	P	P<0.050
TMB	Pd ionic vs PdNPs	500uM					PdNPs vs ionic Pd ( 500 µM)	<0.001	Yes
TMB	Pd ionic vs PdNPs	500uM					Comparisons for factor pH7
TMB	Pd ionic vs PdNPs	500uM					Comparison	P	P<0.050
TMB	Pd ionic vs PdNPs	500uM					PdNPs vs ionic Pd ( 500 µM)	<0.001	Yes
TMB	Pd vs Pt ions	100um	One Way ANOVA	pH			Comparison	P	P<0.050
TMB	Pd vs Pt ions	100um		<0.001			pH3 vs pH7	<0.001	Yes
TMB	Pd vs Pt ions	100um					pH3 vs pH5	<0.001	Yes
TMB	Pd vs Pt ions	100um					pH5 vs pH7	<0.001	Yes
TMB	Pd vs Pt ions	250 µm	One Way ANOVA	pH
TMB	Pd vs Pt ions	250 µm		<0.001			Comparison	P	P<0.050
TMB	Pd vs Pt ions	250 µm					pH3 vs pH7	<0.001	Yes
TMB	Pd vs Pt ions	250 µm					pH3 vs pH5	0.001	Yes
TMB	Pd vs Pt ions	250 µm					pH5 vs pH7	<0.001	Yes
TMB	Pd vs Pt ions	500 µm	One Way ANOVA	pH
TMB	Pd vs Pt ions	500 µm		<0.001			Comparison	P	P<0.050
TMB	Pd vs Pt ions	500 µm					pH3 vs pH7	<0.001	Yes
TMB	Pd vs Pt ions	500 µm					pH3 vs pH5	<0.001	Yes
TMB	bi-metallic NPs		Two Way ANOVA	Pd/PtNPs concentration	pH	[NPs] x pH
TMB	bi-metallic NPs			<0.001	<0.001	<0.001	All Pairwise Multiple Comparison Procedures (Bonferroni t-test):
TMB	bi-metallic NPs						Comparisons for factor: pH
TMB	bi-metallic NPs						Comparison	P	P<0.050
TMB	bi-metallic NPs						pH3 vs pH7	<0.001	Yes
TMB	bi-metallic NPs						pH3 vs pH5	<0.001	Yes
TMB	bi-metallic NPs						pH5 vs pH7	<0.001	Yes
TMB	bi-metallic NPs						Comparisons for factor: concentration of Pd/PtNPs (µM)
TMB	bi-metallic NPs						Comparison	P	P<0.050
TMB	bi-metallic NPs						500 µM vs. 100 µM	<0.001	Yes
TMB	bi-metallic NPs						500 µM vs. 250 µM	<0.001	Yes
TMB	bi-metallic NPs						250 µM vs. 100 µM	<0.001	Yes
TMB	bi-metallic NPs						Comparisons for factor: concentration of Pd/PtNPs (µM) within pH3
TMB	bi-metallic NPs						Comparison	P	P<0.050
TMB	bi-metallic NPs						500 µM vs. 100 µM	<0.001	Yes
TMB	bi-metallic NPs						500 µM vs. 250 µM	<0.001	Yes
TMB	bi-metallic NPs						250 µM vs. 100 µM	<0.001	Yes
TMB	bi-metallic NPs						Comparisons for factor: concentration of Pd/PtNPs (µM) within pH5
TMB	bi-metallic NPs						Comparison	P	P<0.050
TMB	bi-metallic NPs						500 µM vs. 100 µM	<0.001	Yes
TMB	bi-metallic NPs						500 µM vs. 250 µM	<0.001	Yes
TMB	bi-metallic NPs						250 µM vs. 100 µM	<0.001	Yes
TMB	bi-metallic NPs						Comparisons for factor: concentration of Pd/PtNPs (µM) within pH7
TMB	bi-metallic NPs						Comparison	P	P<0.050
TMB	bi-metallic NPs						500 µM vs. 100 µM	0.007	Yes
TMB	bi-metallic NPs						500 µM vs. 250 µM	0.265	No
TMB	bi-metallic NPs						250 µM vs. 100 µM	0.312	No
TMB	bi-metallic NPs						Comparisons for factor: pH within 100µM of Pd/PtNPs
TMB	bi-metallic NPs						Comparison	P	P<0.050
TMB	bi-metallic NPs						pH3 vs pH7	<0.001	Yes
TMB	bi-metallic NPs						pH3 vs pH5	<0.001	Yes
TMB	bi-metallic NPs						pH5 vs pH7	0.196	No
TMB	bi-metallic NPs						Comparisons for factor: pH within 250µM of Pd/PtNPs
TMB	bi-metallic NPs						Comparison	P	P<0.050
TMB	bi-metallic NPs						pH3 vs pH7	<0.001	Yes
TMB	bi-metallic NPs						pH3 vs pH5	<0.001	Yes
TMB	bi-metallic NPs						pH5 vs pH7	<0.001	Yes
TMB	bi-metallic NPs						Comparisons for factor: pH within 500µM of Pd/PtNPs
TMB	bi-metallic NPs						Comparison	P	P<0.050
TMB	bi-metallic NPs						pH3 vs pH7	<0.001	Yes
TMB	bi-metallic NPs						pH3 vs pH5	<0.001	Yes
TMB	bi-metallic NPs						pH5 vs pH7	<0.001	Yes
ABTS	PtNPs		Two Way ANOVA	PtNPs concentration	pH	[PtNPs] x pH	Comparisons for factor: pH
ABTS	PtNPs			<0.001	0.483	0.083	Comparison	P	P<0.050
ABTS	PtNPs						pH7 vs pH3	0.819	No
ABTS	PtNPs						pH7 vs pH5	1	Do Not Test
ABTS	PtNPs						pH5 vs pH3	1	Do Not Test
ABTS	PtNPs
ABTS	PtNPs
ABTS	PtNPs						Comparisons for factor: concentration_PtNPs(µM)
ABTS	PtNPs						Comparison	P	P<0.050
ABTS	PtNPs						500 µM vs. 100 µM	<0.001	Yes
ABTS	PtNPs						500 µM vs. 250 µM	<0.001	Yes
ABTS	PtNPs						250 µM vs. 100 µM	1	No
ABTS	PtNPs
ABTS	PtNPs
ABTS	PtNPs						Comparisons for factor: concentration PtNPs (µM) within pH3
ABTS	PtNPs						Comparison	P	P<0.050
ABTS	PtNPs						500 µM vs. 250 µM	0.001	Yes
ABTS	PtNPs						500 µM vs. 100 µM	0.067	No
ABTS	PtNPs						250 µM vs. 100 µM	0.228	No
ABTS	PtNPs
ABTS	PtNPs
ABTS	PtNPs						Comparisons for factor: concentration PtNPs (µM) within pH5
ABTS	PtNPs						Comparison	P	P<0.050
ABTS	PtNPs						500 µM vs. 100 µM	<0.001	Yes
ABTS	PtNPs						500 µM vs. 250 µM	0.003	Yes
ABTS	PtNPs						250 µM vs. 100 µM	0.443	No
ABTS	PtNPs
ABTS	PtNPs
ABTS	PtNPs						Comparisons for factor: concentration PtNPs (µM) within pH7
ABTS	PtNPs						Comparison	P	P<0.050
ABTS	PtNPs						500 µM vs. 100 µM	<0.001	Yes
ABTS	PtNPs						500 µM vs. 250 µM	0.007	Yes
ABTS	PtNPs						250 µM vs. 100 µM	0.235	No
ABTS	PtNPs
ABTS	PtNPs
ABTS	PtNPs						Comparisons for factor: pH within 100 µM of PtNPs
ABTS	PtNPs						Comparison	P	P<0.050
ABTS	PtNPs						pH3 vs pH5	0.406	No
ABTS	PtNPs						pH3 vs pH7	0.408	Do Not Test
ABTS	PtNPs						pH7 vs pH5	1	Do Not Test
ABTS	PtNPs
ABTS	PtNPs
ABTS	PtNPs						Comparisons for factor: pH within 250 µM of PtNPs
ABTS	PtNPs						Comparison	P	P<0.050
ABTS	PtNPs						pH7 vs pH3	0.126	No
ABTS	PtNPs						pH7 vs pH5	1	Do Not Test
ABTS	PtNPs						pH5 vs pH3	0.251	Do Not Test
ABTS	PtNPs
ABTS	PtNPs
ABTS	PtNPs						Comparisons for factor: pH within 500 µM of PtNPs
ABTS	PtNPs						Comparison	P	P<0.050
ABTS	PtNPs						pH5 vs pH3	0.499	No
ABTS	PtNPs						pH5 vs pH7	1	Do Not Test
ABTS	PtNPs						pH7 vs pH3	0.601	Do Not Test
ABTS	PtNPs
ABTS	PtNPs
ABTS	Pt ions			Pt ions concentration	pH	[Pt ions] x pH	Comparisons for factor: pH
ABTS	Pt ions			<0.001	<0.001	<0.001	All Pairwise Multiple Comparison Procedures (Bonferroni t-test):
ABTS	Pt ions
ABTS	Pt ions						Comparisons for factor: pH
ABTS	Pt ions						Comparison	P	P<0.050
ABTS	Pt ions						pH7 vs pH3	<0.001	Yes
ABTS	Pt ions						pH7 vs pH5	<0.001	Yes
ABTS	Pt ions						pH5 vs pH3	<0.001	Yes
ABTS	Pt ions
ABTS	Pt ions
ABTS	Pt ions						Comparisons for factor: concentration Pt ions (uM)
ABTS	Pt ions						Comparison	P	P<0.050
ABTS	Pt ions						250 µM vs. 100 µM	<0.001	Yes
ABTS	Pt ions						500 µM vs. 250 µM	0.007	Yes
ABTS	Pt ions						500 µM vs. 100 µM	<0.001	Yes
ABTS	Pt ions
ABTS	Pt ions
ABTS	Pt ions						Comparisons for factor: concentration Pt ions (uM) within pH 3
ABTS	Pt ions						Comparison	P	P<0.050
ABTS	Pt ions						250 µM vs. 100 µM	<0.001	Yes
ABTS	Pt ions						500 µM vs. 250 µM	<0.001	Yes
ABTS	Pt ions						500 µM vs. 100 µM	<0.001	Yes
ABTS	Pt ions
ABTS	Pt ions
ABTS	Pt ions						Comparisons for factor: concentration Pt ions (uM) within pH 5
ABTS	Pt ions						Comparison	P	P<0.050
ABTS	Pt ions						250 µM vs. 100 µM	<0.001	Yes
ABTS	Pt ions						500 µM vs. 250 µM	0.002	Yes
ABTS	Pt ions						500 µM vs. 100 µM	<0.001	Yes
ABTS	Pt ions
ABTS	Pt ions
ABTS	Pt ions						Comparisons for factor: concentration Pt ions (uM) within pH 7
ABTS	Pt ions						Comparison	P	P<0.050
ABTS	Pt ions						500 µM vs. 100 µM	<0.001	Yes
ABTS	Pt ions						500 µM vs. 250 µM	0.031	Yes
ABTS	Pt ions						250 µM vs. 100 µM	<0.001	Yes
ABTS	Pt ions
ABTS	Pt ions
ABTS	Pt ions						Comparisons for factor: pH within 100µM
ABTS	Pt ions						Comparison	P	P<0.050
ABTS	Pt ions						pH3 vs pH7	1	No
ABTS	Pt ions						pH3 vs pH5	1	Do Not Test
ABTS	Pt ions						pH5 vs pH7	1	Do Not Test
ABTS	Pt ions
ABTS	Pt ions
ABTS	Pt ions						Comparisons for factor: pH within 250µM
ABTS	Pt ions						Comparison	P	P<0.050
ABTS	Pt ions						pH3 vs pH7	<0.001	Yes
ABTS	Pt ions						pH7 vs pH5	<0.001	Yes
ABTS	Pt ions						pH5 vs pH3	<0.001	Yes
ABTS	Pt ions
ABTS	Pt ions
ABTS	Pt ions						Comparisons for factor: pH within 500µM
ABTS	Pt ions						Comparison	P	P<0.050
ABTS	Pt ions						pH3 vs pH7	<0.001	Yes
ABTS	Pt ions						pH7 vs pH5	<0.001	Yes
ABTS	Pt ions						pH5 vs pH3	<0.001	Yes
ABTS	Pt ionic vs PtNPs		Two Way ANOVA	ionic/NPs 100 µM	pH	ionic/NPs x pH
ABTS	Pt ionic vs PtNPs			<0.001	0.006	0.047	All Pairwise Multiple Comparison Procedures (Bonferroni t-test):
ABTS	Pt ionic vs PtNPs
ABTS	Pt ionic vs PtNPs						Comparisons for factor: Pt ions vs PtNPs
ABTS	Pt ionic vs PtNPs						Comparison	P	P<0.050
ABTS	Pt ionic vs PtNPs						Comparisons for factor: Pt ions vs PtNPs	<0.001	Yes
ABTS	Pt ionic vs PtNPs						Comparisons for factor: pH
ABTS	Pt ionic vs PtNPs						Comparison	P	P<0.050
ABTS	Pt ionic vs PtNPs						pH3 vs pH7	0.012	Yes
ABTS	Pt ionic vs PtNPs						pH3 vs pH5	0.013	Yes
ABTS	Pt ionic vs PtNPs						pH5 vs pH7	1	No
ABTS	Pt ionic vs PtNPs						Comparisons for factor: pH within Pt ions at 100uM
ABTS	Pt ionic vs PtNPs						Comparison	P	P<0.050
ABTS	Pt ionic vs PtNPs						pH3 vs pH5	1	No
ABTS	Pt ionic vs PtNPs						pH3 vs pH7	1	Do Not Test
ABTS	Pt ionic vs PtNPs						pH7 vs pH5	1	Do Not Test
ABTS	Pt ionic vs PtNPs						Comparisons for factor: pH within PtNPs at 100uM
ABTS	Pt ionic vs PtNPs						Comparison	P	P<0.050
ABTS	Pt ionic vs PtNPs						pH3 vs pH7	0.003	Yes
ABTS	Pt ionic vs PtNPs						pH3 vs pH5	0.004	Yes
ABTS	Pt ionic vs PtNPs						pH7 vs pH5	1	No
ABTS	Pt ionic vs PtNPs						Comparisons for factor: Pt ions vs PtNPs at pH3
ABTS	Pt ionic vs PtNPs						Comparison	P	P<0.050
ABTS	Pt ionic vs PtNPs							<0.001	Yes
ABTS	Pt ionic vs PtNPs						Comparisons for factor: Pt ions vs PtNPs at pH5
ABTS	Pt ionic vs PtNPs						Comparison	P	P<0.050
ABTS	Pt ionic vs PtNPs							<0.001	Yes
ABTS	Pt ionic vs PtNPs						Comparisons for factor: Pt ions vs PtNPs at pH7
ABTS	Pt ionic vs PtNPs						Comparison	P	P<0.050
ABTS	Pt ionic vs PtNPs							<0.001	Yes
ABTS	PdNPs	100uM	One Way ANOVA				Comparison	P	P<0.050
ABTS	PdNPs	100uM	P=0.008				pH3 vs pH5	0.012	Yes
ABTS	PdNPs	100uM					pH3 vs pH7	0.023	Yes
ABTS	PdNPs	100uM					pH7 vs pH5	1	No
ABTS	PdNPs	250uM	t-test	pH3 vs pH5
ABTS	PdNPs	250uM	P = 0.002
ABTS	PdNPs	500uM	t-test	pH3 vs pH5
ABTS	PdNPs	500uM	P = <0.001
ABTS	PdNPs		One Way ANOVA pH3				Comparisons for factor: concentration PdNPs (µM) within pH3
ABTS	PdNPs		P<0.001				Comparison	P	P<0.050
ABTS	PdNPs						500 µM vs. 100 µM	<0.001	Yes
ABTS	PdNPs						500 µM vs. 250 µM	1	No
ABTS	PdNPs						250 µM vs. 100 µM	<0.001	Yes
ABTS	PdNPs		One Way ANOVA pH5				Comparisons for factor: concentration PdNPs (µM) within pH3
ABTS	PdNPs		P=0.005				Comparison	P	P<0.050
ABTS	PdNPs						500 µM vs. 100 µM	0.005	Yes
ABTS	PdNPs						500 µM vs. 250 µM	0.275	No
ABTS	PdNPs						250 µM vs. 100 µM	0.048	Yes
ABTS	PdNPs
ABTS	PdNPs
ABTS	PdNPs
ABTS	PdNPs
ABTS	Pd ions	100uM	One Way ANOVA				Comparison	P	P<0.050
ABTS	Pd ions	100uM	P <0.001				pH3 vs pH5	<0.001	Yes
ABTS	Pd ions	100uM					pH3 vs pH7	<0.001	Yes
ABTS	Pd ions	100uM					pH7 vs pH5	0.351	No
ABTS	Pd ions	250uM	One Way ANOVA				Comparison
ABTS	Pd ions	250uM	P=0.006				pH3 vs pH5	0.008	Yes
ABTS	Pd ions	250uM					pH3 vs pH7	0.019	Yes
ABTS	Pd ions	250uM					pH7 vs pH5	1	No
ABTS	Pd ions	500uM	One Way ANOVA				Comparison	P	P<0.050
ABTS	Pd ions	500uM	P=0.011				pH3 vs pH5	0.017	Yes
ABTS	Pd ions	500uM					pH3 vs pH7	0.034	Yes
ABTS	Pd ions	500uM					pH7 vs pH5	1	No
ABTS	Pd ions vs PdNPs	pH3	Two Way ANOVA	Pd ions vs PdNPs	concentration of metal	Pd ions vs PdNPs x concentration	All Pairwise Multiple Comparison Procedures (Bonferroni t-test):
ABTS	Pd ions vs PdNPs	pH3		<0.001	<0.001	<0.001
ABTS	Pd ions vs PdNPs	pH3					Comparison	P	P<0.050
ABTS	Pd ions vs PdNPs	pH3					Comparisons for factor: Pd ions vs PdNPs at 100µM	0.92	No
ABTS	Pd ions vs PdNPs	pH3					Comparisons for factor: Pd ions vs PdNPs at 250µM	<0.001	Yes
ABTS	Pd ions vs PdNPs	pH3					Comparisons for factor: Pd ions vs PdNPs at 500µM	<0.001	Yes
ABTS	bi-metallic NPs		Two Way ANOVA	pH	concentration of PdPtNPs	pH x NPs concentration	Comparisons for factor: pH	P	P<0.050
ABTS	bi-metallic NPs			<0.001	<0.001	<0.001	Comparison	<0.001	Yes
ABTS	bi-metallic NPs						pH3 vs pH7	<0.001	Yes
ABTS	bi-metallic NPs						pH3 vs pH5	<0.001	Yes
ABTS	bi-metallic NPs						pH7 vs pH5
ABTS	bi-metallic NPs						Comparisons for factor: concentration_PdPtNPs (µM)
ABTS	bi-metallic NPs						Comparison	P	P<0.050
ABTS	bi-metallic NPs						500 µM vs. 100 µM	<0.001	Yes
ABTS	bi-metallic NPs						500 µM vs. 250 µM	<0.001	Yes
ABTS	bi-metallic NPs						250 µM vs. 100 µM	<0.001	Yes
ABTS	bi-metallic NPs						Comparisons for factor: concentration PdPtNPs (µM) within pH3
ABTS	bi-metallic NPs						Comparison	P	P<0.050
ABTS	bi-metallic NPs						500 µM vs. 100 µM	<0.001	Yes
ABTS	bi-metallic NPs						500 µM vs. 250 µM	<0.001	Yes
ABTS	bi-metallic NPs						250 µM vs. 100 µM	<0.001	Yes
ABTS	bi-metallic NPs						Comparisons for factor: concentration PdPtNPs (µM) within pH5
ABTS	bi-metallic NPs						Comparison	P	P<0.050
ABTS	bi-metallic NPs						500 µM vs. 100 µM	<0.001	Yes
ABTS	bi-metallic NPs						500 µM vs. 250 µM	<0.001	Yes
ABTS	bi-metallic NPs						250 µM vs. 100 µM	0.004	Yes
ABTS	bi-metallic NPs						Comparisons for factor: concentration PdPtNPs (µM) within pH7
ABTS	bi-metallic NPs						Comparison	P	P<0.050
ABTS	bi-metallic NPs						500 µM vs. 250 µM	0.759	No
ABTS	bi-metallic NPs						500 µM vs. 100 µM	1	Do Not Test
ABTS	bi-metallic NPs						250 µM vs. 100 µM	1	Do Not Test
ABTS	bi-metallic NPs						Comparisons for factor: pH within 100 µM PdPtNP	P	P<0.050
ABTS	bi-metallic NPs						pH3 vs pH7	<0.001	Yes
ABTS	bi-metallic NPs						pH3 vs pH5	<0.001	Yes
ABTS	bi-metallic NPs						pH7 vs pH5	1	No
ABTS	bi-metallic NPs						Comparisons for factor: pH within 250 µM PdPtNP	P	P<0.050
ABTS	bi-metallic NPs						pH3 vs pH7	<0.001	Yes
ABTS	bi-metallic NPs						pH3 vs pH5	<0.001	Yes
ABTS	bi-metallic NPs						pH7 vs pH5	<0.001	Yes
ABTS	bi-metallic NPs						Comparisons for factor: pH within 500 µM PdPtNP	P	P<0.050
ABTS	bi-metallic NPs						pH3 vs pH7	<0.001	Yes
ABTS	bi-metallic NPs						pH3 vs pH5	<0.001	Yes
ABTS	bi-metallic NPs						pH7 vs pH5	<0.001	Yes
ABTS	bi-metallic NPs
ABTS	all 3 NPs types	pH3/100uM	One Way ANOVA
ABTS	all 3 NPs types	pH3/100uM	P=0.002				Comparison	P	P<0.050
ABTS	all 3 NPs types	pH3/100uM					PtNPs 100uM vs. PdNPs 100uM	0.003	Yes
ABTS	all 3 NPs types	pH3/100uM					PtNPs 100uM vs. bi-NPs 100uM	0.006	Yes
ABTS	all 3 NPs types	pH3/100uM					bi-NPs 100uM vs. PdNPs 100uM	1	No
ABTS	all 3 NPs types	pH3/250uM	One Way ANOVA				Comparison	P	P<0.050
ABTS	all 3 NPs types	pH3/250uM	P=0.009				PdNPs 250uM vs. PtNPs 250uM	0.01	Yes
ABTS	all 3 NPs types	pH3/250uM					PdNPs 250uM vs. bi-NPs 250uM	0.129	No
ABTS	all 3 NPs types	pH3/250uM					bi-NPs 250uM vs. PtNPs 250uM	0.216	No
ABTS	all 3 NPs types	pH3/500uM	One Way ANOVA
ABTS	all 3 NPs types	pH3/500uM	P=0.214
2,6-DMP	PdNPs		Two Way ANOVA	Pd NPs concentration	pH	[Pd NPs] x pH	All Pairwise Multiple Comparison Procedures (Bonferroni t-test):
2,6-DMP	PdNPs			<0.001	<0.001	<0.001
2,6-DMP	PdNPs						Comparisons for factor: pH
2,6-DMP	PdNPs						Comparison	P	P<0.050
2,6-DMP	PdNPs						pH7 vs pH5	<0.001	Yes
2,6-DMP	PdNPs						pH7 vs pH3	<0.001	Yes
2,6-DMP	PdNPs						pH3 vs pH5	0.004	Yes
2,6-DMP	PdNPs						Comparisons for factor: concentration of PdNPs (uM)
2,6-DMP	PdNPs						Comparison	P	P<0.050
2,6-DMP	PdNPs						500 µM vs. 100 µM	<0.001	Yes
2,6-DMP	PdNPs						500 µM vs. 250 µM	<0.001	Yes
2,6-DMP	PdNPs						250 µM vs. 100 µM	<0.001	Yes
2,6-DMP	PdNPs						Comparisons for factor: concentration of PdNPs (uM) within pH3
2,6-DMP	PdNPs						Comparison	P	P<0.050
2,6-DMP	PdNPs						500 µM vs. 100 µM	<0.001	Yes
2,6-DMP	PdNPs						500 µM vs. 250 µM	<0.001	Yes
2,6-DMP	PdNPs						250 µM vs. 100 µM	0.002	Yes
2,6-DMP	PdNPs						Comparisons for factor: concentration of PdNPs (uM) within pH5
2,6-DMP	PdNPs						Comparison	P	P<0.050
2,6-DMP	PdNPs						500 µM vs. 100 µM	<0.001	Yes
2,6-DMP	PdNPs						500 µM vs. 250 µM	<0.001	Yes
2,6-DMP	PdNPs						250 µM vs. 100 µM	0.075	No
2,6-DMP	PdNPs						Comparisons for factor: concentration of PdNPs (uM) within pH7
2,6-DMP	PdNPs						Comparison	P	P<0.050
2,6-DMP	PdNPs						500 µM vs. 100 µM	<0.001	Yes
2,6-DMP	PdNPs						500 µM vs. 250 µM	<0.001	Yes
2,6-DMP	PdNPs						250 µM vs. 100 µM	<0.001	Yes
2,6-DMP	PdNPs						Comparisons for factor: pH within 100µM
2,6-DMP	PdNPs						Comparison	P	P<0.050
2,6-DMP	PdNPs						pH7 vs pH5	0.008	Yes
2,6-DMP	PdNPs						pH7 vs pH3	0.093	No
2,6-DMP	PdNPs						pH3 vs pH5	0.793	No
2,6-DMP	PdNPs						Comparisons for factor: pH within 250µM
2,6-DMP	PdNPs						Comparison	P	P<0.050
2,6-DMP	PdNPs						pH7 vs pH5	<0.001	Yes
2,6-DMP	PdNPs						pH7 vs pH3	<0.001	Yes
2,6-DMP	PdNPs						pH3 vs pH5	0.035	Yes
2,6-DMP	PdNPs						Comparisons for factor: pH within 500µM
2,6-DMP	PdNPs						Comparison	P	P<0.050
2,6-DMP	PdNPs						pH7 vs pH5	<0.001	Yes
2,6-DMP	PdNPs						pH7 vs pH3	<0.001	Yes
2,6-DMP	PdNPs						pH3 vs pH5	0.061	No
2,6-DMP	Pd ionic		Two Way ANOVA	pH	concentration of Pd ions	[Pd ions] x pH	All Pairwise Multiple Comparison Procedures (Bonferroni t-test):
2,6-DMP	Pd ionic			0.004	0.497	0.12	Comparisons for factor: pH
2,6-DMP	Pd ionic						Comparison	P	P<0.050
2,6-DMP	Pd ionic						pH7 vs pH3	0.01	Yes
2,6-DMP	Pd ionic						pH7 vs pH5	0.011	Yes
2,6-DMP	Pd ionic						pH3 vs pH5	1	No
2,6-DMP	Pd ionic						Comparisons for factor: concentratin of Pd ions (µM)
2,6-DMP	Pd ionic						Comparison	P	P<0.050
2,6-DMP	Pd ionic						250 µM vs. 500 µM	0.793	No
2,6-DMP	Pd ionic						250 µM vs. 100 µM	1	Do Not Test
2,6-DMP	Pd ionic						100 µM vs. 500 µM	1	Do Not Test
2,6-DMP	Pd ionic						Comparisons for factor: concentratin of Pd ions (µM) within pH3
2,6-DMP	Pd ionic						Comparison	P	P<0.050
2,6-DMP	Pd ionic						250 µM vs. 500 µM	0.095	No
2,6-DMP	Pd ionic						250 µM vs. 100 µM	1	Do Not Test
2,6-DMP	Pd ionic						100 µM vs. 500 µM	0.537	Do Not Test
2,6-DMP	Pd ionic						Comparisons for factor: concentratin of Pd ions (µM) within pH5
2,6-DMP	Pd ionic						Comparison	P	P<0.050
2,6-DMP	Pd ionic						100 µM vs. 500 µM	0.482	No
2,6-DMP	Pd ionic						100 µM vs. 250 µM	0.598	Do Not Test
2,6-DMP	Pd ionic						250 µM vs. 500 µM	1	Do Not Test
2,6-DMP	Pd ionic						Comparisons for factor: concentratin of Pd ions (µM) within pH7
2,6-DMP	Pd ionic						Comparison	P	P<0.050
2,6-DMP	Pd ionic						100 µM vs. 500 µM	0.6	No
2,6-DMP	Pd ionic						500 µM vs. 250 µM	1	Do Not Test
2,6-DMP	Pd ionic						250 µM vs. 100 µM	1	Do Not Test
2,6-DMP	Pd ionic						Comparisons for factor: pH within 100µM of Pd ions
2,6-DMP	Pd ionic						Comparison	P	P<0.050
2,6-DMP	Pd ionic						pH7 vs pH3	0.905	No
2,6-DMP	Pd ionic						pH7 vs pH5	1	Do Not Test
2,6-DMP	Pd ionic						pH3 vs pH5	1	Do Not Test
2,6-DMP	Pd ionic						Comparisons for factor: pH within 250µM of Pd ions
2,6-DMP	Pd ionic						Comparison	P	P<0.050
2,6-DMP	Pd ionic						pH7 vs pH5	0.072	No
2,6-DMP	Pd ionic						pH7 vs pH3	0.995	Do Not Test
2,6-DMP	Pd ionic						pH3 vs pH5	0.481	Do Not Test
2,6-DMP	Pd ionic						Comparisons for factor: pH within 500µM of Pd ions
2,6-DMP	Pd ionic						Comparison	P	P<0.050
2,6-DMP	Pd ionic						pH7 vs pH3	0.004	Yes
2,6-DMP	Pd ionic						pH7 vs pH5	0.02	Yes
2,6-DMP	Pd ionic						pH3 vs pH5	1	No
2,6-DMP	PtNPs	100uM	One Way ANOVA				Comparison	P	P<0.050
2,6-DMP	PtNPs	100uM	P=0.026				pH5 vs pH3	0.038	Yes
2,6-DMP	PtNPs	100uM					pH7 vs pH5	1	No
2,6-DMP	PtNPs	100uM					pH3 vs pH7	0.072	No
2,6-DMP	PtNPs	250uM	One Way ANOVA
2,6-DMP	PtNPs	250uM	P=0.083
2,6-DMP	PtNPs	500um	One Way ANOVA
2,6-DMP	PtNPs	500um	P=0.031				Comparison	P	P<0.050
2,6-DMP	PtNPs	500um					pH7 vs pH3	0.04	Yes
2,6-DMP	PtNPs	500um					pH7 vs pH5	0.119	No
2,6-DMP	PtNPs	500um					pH3 vs pH5	1	No
2,6-DMP	PtNPs
2,6-DMP	PtNPs		One Way ANOVA	pH3			Comparisons for factor: concentration_PtNPs (µM) pH3
2,6-DMP	PtNPs		P=0.008				Comparison	P	P<0.050
2,6-DMP	PtNPs						500 µM vs. 100 µM	0.011	Yes
2,6-DMP	PtNPs						500 µM vs. 250 µM	1	No
2,6-DMP	PtNPs						250 µM vs. 100 µM	0.027	Yes
2,6-DMP	PtNPs		One Way ANOVA	pH5			Comparisons for factor: concentration_PtNPs (µM) pH5
2,6-DMP	PtNPs		P=0.008				Comparison	P	P<0.050
2,6-DMP	PtNPs						500 µM vs. 100 µM	0.021	Yes
2,6-DMP	PtNPs						500 µM vs. 250 µM	0.391	No
2,6-DMP	PtNPs						250 µM vs. 100 µM	0.197	No
2,6-DMP	PtNPs		One Way ANOVA	pH7			Comparisons for factor: concentratin of PtNPs (µM) within pH7
2,6-DMP	PtNPs		P=0.014				Comparison
2,6-DMP	PtNPs						100 µM vs. 500 µM	0.016	Yes
2,6-DMP	PtNPs						500 µM vs. 250 µM	0.088	No
2,6-DMP	PtNPs						250 µM vs. 100 µM	0.61	No
2,6-DMP	bi-metallic NPs		One Way ANOVA	pH3			Comparisons for factor: concentration_PtNPs (µM) pH3
2,6-DMP	bi-metallic NPs		<0.001				Comparison	P	P<0.050
2,6-DMP	bi-metallic NPs						500 µM vs. 100 µM	<0.001	Yes
2,6-DMP	bi-metallic NPs						500 µM vs. 250 µM	0.107	No
2,6-DMP	bi-metallic NPs						250 µM vs. 100 µM	<0.001	Yes
2,6-DMP	bi-metallic NPs		One Way ANOVA	pH5			Comparisons for factor: concentration_PtNPs (µM) pH5
2,6-DMP	bi-metallic NPs		<0.001				Comparison	P	P<0.050
2,6-DMP	bi-metallic NPs						500 µM vs. 100 µM	<0.001	Yes
2,6-DMP	bi-metallic NPs						500 µM vs. 250 µM	0.001	Yes
2,6-DMP	bi-metallic NPs						250 µM vs. 100 µM	0.004	Yes
2,6-DMP	bi-metallic NPs		One Way ANOVA	pH7			Comparisons for factor: concentration_PtNPs (µM) pH7
2,6-DMP	bi-metallic NPs		<0.001				Comparison	P	P<0.050
2,6-DMP	bi-metallic NPs						500 µM vs. 100 µM	<0.001	Yes
2,6-DMP	bi-metallic NPs						500 µM vs. 250 µM	<0.001	Yes
2,6-DMP	bi-metallic NPs						250 µM vs. 100 µM	<0.001	Yes
2,6-DMP	bi-metallic NPs	100uM	One Way ANOVA				Comparisons for factor: pH within 100µM of bi-metallic NPs
2,6-DMP	bi-metallic NPs	100uM	<0.001				Comparison	P	P<0.050
2,6-DMP	bi-metallic NPs	100uM					pH7 vs pH5	<0.001	Yes
2,6-DMP	bi-metallic NPs	100uM					pH7 vs pH3	0.081	No
2,6-DMP	bi-metallic NPs	100uM					pH3 vs pH5	0.011	Yes
2,6-DMP	bi-metallic NPs	250uM	One Way ANOVA				Comparisons for factor: pH within 250µM of bi-metallic NPs
2,6-DMP	bi-metallic NPs	250uM	<0.001				Comparison	P	P<0.050
2,6-DMP	bi-metallic NPs	250uM					pH7 vs pH5	<0.001	Yes
2,6-DMP	bi-metallic NPs	250uM					pH7 vs pH3	<0.001	Yes
2,6-DMP	bi-metallic NPs	250uM					pH3 vs pH5	1	No
2,6-DMP	bi-metallic NPs	500uM	One Way ANOVA				Comparisons for factor: pH within 500µM of bi-metallic NPs
2,6-DMP	bi-metallic NPs	500uM	<0.001				Comparison	P	P<0.050
2,6-DMP	bi-metallic NPs	500uM					pH7 vs pH5	<0.001	Yes
2,6-DMP	bi-metallic NPs	500uM					pH7 vs pH3	<0.001	Yes
2,6-DMP	bi-metallic NPs	500uM					pH3 vs pH5	0.6	No
2,6-DMP	bi-NPs vs PdNPs	100uM	Two Way ANOVA	bi-NPs vs PdNPs	pH	bi-NPs vs PdNPs x pH
2,6-DMP	bi-NPs vs PdNPs	100uM		0.078	<0.001	0.038	Comparisons for factor: bi-NPs vs PdNPs within pH3
2,6-DMP	bi-NPs vs PdNPs	100uM					Comparison	P	P<0.050
2,6-DMP	bi-NPs vs PdNPs	100uM					bi-NPs vs PdNPs	0.959	No
2,6-DMP	bi-NPs vs PdNPs	100uM					Comparisons for factor: bi-NPs vs PdNPs within pH5
2,6-DMP	bi-NPs vs PdNPs	100uM					Comparison	P	P<0.050
2,6-DMP	bi-NPs vs PdNPs	100uM					bi-NPs vs PdNPs	0.898	No
2,6-DMP	bi-NPs vs PdNPs	100uM					Comparisons for factor: bi-NPs vs PdNPs within pH7
2,6-DMP	bi-NPs vs PdNPs	100uM					Comparison	P	P<0.050
2,6-DMP	bi-NPs vs PdNPs	100uM					bi-NPs vs PdNPs	0.004	Yes
2,6-DMP	bi-NPs vs PdNPs	100uM
2,6-DMP	bi-NPs vs PdNPs	250uM	Two Way ANOVA	bi-NPs vs PdNPs	pH	250uM of bi-NPs/PdNPs x pH
2,6-DMP	bi-NPs vs PdNPs	250uM		0.31	<0.001	0.379
2,6-DMP	bi-NPs vs PdNPs	500uM	Two Way ANOVA	bi-NPs vs PdNPs	pH	250uM of bi-NPs/PdNPs x pH	All Pairwise Multiple Comparison Procedures (Bonferroni t-test):
2,6-DMP	bi-NPs vs PdNPs	500uM		<0.001	<0.001	0.002
2,6-DMP	bi-NPs vs PdNPs	500uM					Comparisons for factor: 500µM of bi-NPs vs PdNPs
2,6-DMP	bi-NPs vs PdNPs	500uM					Comparison	P	P<0.050
2,6-DMP	bi-NPs vs PdNPs	500uM					bi-NPs vs PdNPs	<0.001	Yes
2,6-DMP	bi-NPs vs PdNPs	500uM					Comparisons for factor: 500uM of bi-NPs vs PdNPs within pH3
2,6-DMP	bi-NPs vs PdNPs	500uM					Comparison	P	P<0.050
2,6-DMP	bi-NPs vs PdNPs	500uM					bi-NPs vs PdNPs	0.044	Yes
2,6-DMP	bi-NPs vs PdNPs	500uM					Comparisons for factor: 500uM of bi-NPs vs PdNPs within pH5
2,6-DMP	bi-NPs vs PdNPs	500uM					Comparison	P	P<0.050
2,6-DMP	bi-NPs vs PdNPs	500uM					bi-NPs vs PdNPs	0.673	No
2,6-DMP	bi-NPs vs PdNPs	500uM					Comparisons for factor: 500uM of bi-NPs vs PdNPs within pH7
2,6-DMP	bi-NPs vs PdNPs	500uM					Comparison	P	P<0.050
2,6-DMP	bi-NPs vs PdNPs	500uM					bi-NPs vs PdNPs	<0.001	Yes
2,6-DMP	PdNPs vs PtNPs	100uM	Two Way ANOVA	PdNPs vs PtNPs	pH	PdNPs/PtNPs x pH
2,6-DMP	PdNPs vs PtNPs	100uM		0.002	<0.001	<0.001	All Pairwise Multiple Comparison Procedures (Bonferroni t-test):
2,6-DMP	PdNPs vs PtNPs	100uM					Comparisons for factor: 100uM PdNPs vs PtNPs within pH3
2,6-DMP	PdNPs vs PtNPs	100uM					Comparison	P	P<0.050
2,6-DMP	PdNPs vs PtNPs	100uM					PdNPs vs PtNPs	0.033	Yes
2,6-DMP	PdNPs vs PtNPs	100uM					Comparisons for factor: 100uM PdNPs vs PtNPs within pH5
2,6-DMP	PdNPs vs PtNPs	100uM					Comparison	P	P<0.050
2,6-DMP	PdNPs vs PtNPs	100uM					PdNPs vs PtNPs	0.115	No
2,6-DMP	PdNPs vs PtNPs	100uM					Comparisons for factor: 100uM PdNPs vs PtNPs within pH7
2,6-DMP	PdNPs vs PtNPs	100uM					Comparison	P	P<0.050
2,6-DMP	PdNPs vs PtNPs	100uM					PdNPs vs PtNPs	<0.001	Yes
2,6-DMP	PdNPs vs PtNPs	250uM	Two Way ANOVA	PdNPs vs PtNPs	pH	PdNPs/PtNPs x pH	Comparisons for factor: 250 uM PdNPs vs PtNPs within pH3
2,6-DMP	PdNPs vs PtNPs	250uM		0.036	<0.001	0.004	Comparison	P	P<0.050
2,6-DMP	PdNPs vs PtNPs	250uM					PdNPs vs PtNPs	0.132	No
2,6-DMP	PdNPs vs PtNPs	250uM					Comparisons for factor: 250 uM PdNPs vs PtNPs within pH5
2,6-DMP	PdNPs vs PtNPs	250uM					Comparison	P	P<0.050
2,6-DMP	PdNPs vs PtNPs	250uM					PdNPs vs PtNPs	0.099	No
2,6-DMP	PdNPs vs PtNPs	250uM					Comparisons for factor: 250 uM PdNPs vs PtNPs within pH7
2,6-DMP	PdNPs vs PtNPs	250uM					Comparison	P	P<0.050
2,6-DMP	PdNPs vs PtNPs	250uM					PdNPs vs PtNPs	0.001	Yes
2,6-DMP	PdNPs vs PtNPs	500uM	Two Way ANOVA	PdNPs vs PtNPs	pH	PdNPs/PtNPs x pH	Comparisons for factor: 500 µM PdNPs vs PtNPs within pH3
2,6-DMP	PdNPs vs PtNPs	500uM		0.004	<0.001	0.066	Comparison	P	P<0.050
2,6-DMP	PdNPs vs PtNPs	500uM					PdNPs vs PtNPs	0.005	Yes
2,6-DMP	PdNPs vs PtNPs	500uM					Comparisons for factor: 500 µM PdNPs vs PtNPs within pH5
2,6-DMP	PdNPs vs PtNPs	500uM					Comparison	P	P<0.050
2,6-DMP	PdNPs vs PtNPs	500uM					PdNPs vs PtNPs	0.941	No
2,6-DMP	PdNPs vs PtNPs	500uM					Comparisons for factor: 500 µM PdNPs vs PtNPs within pH7
2,6-DMP	PdNPs vs PtNPs	500uM					Comparison	P	P<0.050
2,6-DMP	PdNPs vs PtNPs	500uM					PdNPs vs PtNPs	0.019	Yes
